# Supplementary material
Source: PubMed Central journal article supplement (PMC5930340)
Supplement: AEM.00258-18_zam009188494s1.pdf [file AEM.00258-18_zam009188494s1.pdf]

## SUPPLEMENTARY INFORMATION

**Identification and characterization of bacterial enzymes catalyzing the synthesis of 1,8-dihydroxynaphthalene, a key precursor of dihydroxynaphthalene melanin, from *Sorangium cellulosum***

Yusuke Sone<sup>a</sup>, Shuto Nakamura<sup>a</sup>, Makoto Sasaki<sup>a</sup>, Fumihito Hasebe<sup>a</sup>, Seung-Young Kim<sup>a</sup>, and Nobutaka Funa<sup>a, #</sup>

<sup>a</sup>Graduate Division of Nutritional and Environmental Sciences, University of Shizuoka, Shizuoka, Japan

**Running Head:** Enzymes catalyzing 1,8-DHN synthesis from *S. cellulosum*

# Address correspondence to Nobutaka Funa, funa@u-shizuoka-ken.ac.jp

## FIGURE LEGENDS FOR SUPPLEMENTAL FIGURES

**Supplemental Fig S1.** Phylogenetic tree of aldoketo reductase (AKR) superfamily proteins. The phylogenetic tree was constructed using CLUSTALW (<http://clustalw.ddbj.nig.ac.jp>) and was drawn in Njplot. For information on AKR numbering and sequences, refer to <https://www.med.upenn.edu/akr/>.

**Supplemental Fig S2.** Alignment of AKR proteins. AKR13B1 (accession number: AE003996\_7) is a phenylacetaldehyde dehydrogenase from *Xylella fastidiosa*. AKR13D1 (AY766462) is a perakine reductase from *Rauvolfia serpentine*. AKR11A1 (BSU39780) and AKR11B1 (BSU09530) are putative AKRs from *Bacillus subtilis*. The conserved catalytic tetrads are highlighted by triangles.

**Supplemental Fig S3.** Phylogenetic tree of NTF2-like superfamily proteins. The BdsB homologs are shown as accession numbers. Accession numbers of other functionally known enzymes are also shown.

**Supplemental Fig S4.** Alignment of NTF2-like superfamily proteins. The putative active sites of SnoaL2 are highlighted by triangles.

**Supplemental Fig S5.**  $^1\text{H}$ -NMR and  $^{13}\text{C}$ -NMR spectra of scytalone (**3**).

**Supplemental Fig S6.** Chiral chromatography of 3,8-dihydroxy-6-methoxy-tetralone (**7**). Chromatograms of racemic-**7**, (*R*)-**7** derived from *in vivo* experiments, and (*R*)-**7** derived from *in vitro* experiments are shown in the bottom, middle, and top, respectively.

**Supplemental Fig S7.** *In vitro* reconstitution of 1,8-DHN (**1**) synthesis by recombinant proteins. (A) Authentic **1**. (B) Reaction of SoceCHS1, BdsA, and BdsB with malonyl-CoA and NADPH. (C) Negative control reaction of B using boiled enzymes. (D) Reaction of SoceCHS1 with malonyl-CoA. (E) Negative control reaction of D using boiled SoceCHS1.

**Supplemental Fig S8.** Oxidation of (*R*)-scytalone (**3**) by BdsA. (A) HPLC chromatogram of the reaction containing BdsA, (*R*)-**3**, and NADP<sup>+</sup>. Flaviolin (**6**) is derived from auto-oxidation of T<sub>4</sub>HN (**2**). (B) Negative control reaction of A using boiled BdsA.

**Supplemental Fig S9.** Reduction of T<sub>3</sub>HN (**4**) by BdsA. (A) Reaction containing BdsA, **4**, and NADPH. (B) Negative control reaction of A without NADPH. (C) Negative control reaction of A using boiled BdsA.

**Supplemental Fig S10.** <sup>1</sup>H-NMR spectrum of vermelone (**5**). Unassigned signals are from an unknown derivative of **5**.

**Supplemental Fig S11.** Reduction of 1,3-DHN (**9**) by BdsA. (A) Scheme of the reduction of **9** by BdsA. (B) Reaction containing BdsA, **9**, and NADPH. (C) Negative control reaction of B using boiled BdsA. (D) Chiral HPLC chromatogram of racemic **11**. (E) Chiral HPLC chromatogram of (+)-**11**.

**Supplemental Fig S12.** Dehydration of vermelone (**5**) by BdsB. (A) Reaction containing BdsB and **5**. (B) Negative control reaction of A using boiled BdsB.

**Supplemental Fig S13.** Gene organization of *Bds* operons. Type III PKSs, AKRs, and SnoaL2-like proteins are shown in red, green, and blue, respectively.

**Supplemental Fig S14.** SDS-PAGE analysis of recombinant proteins. The gels were stained with Coomassie Brilliant Blue R-250.

**Supplemental Fig S15.** <sup>1</sup>H-NMR spectrum of 1,3,8-trihydroxynaphthalene (**4**). Unassigned signals are from an unknown derivative of **4**.

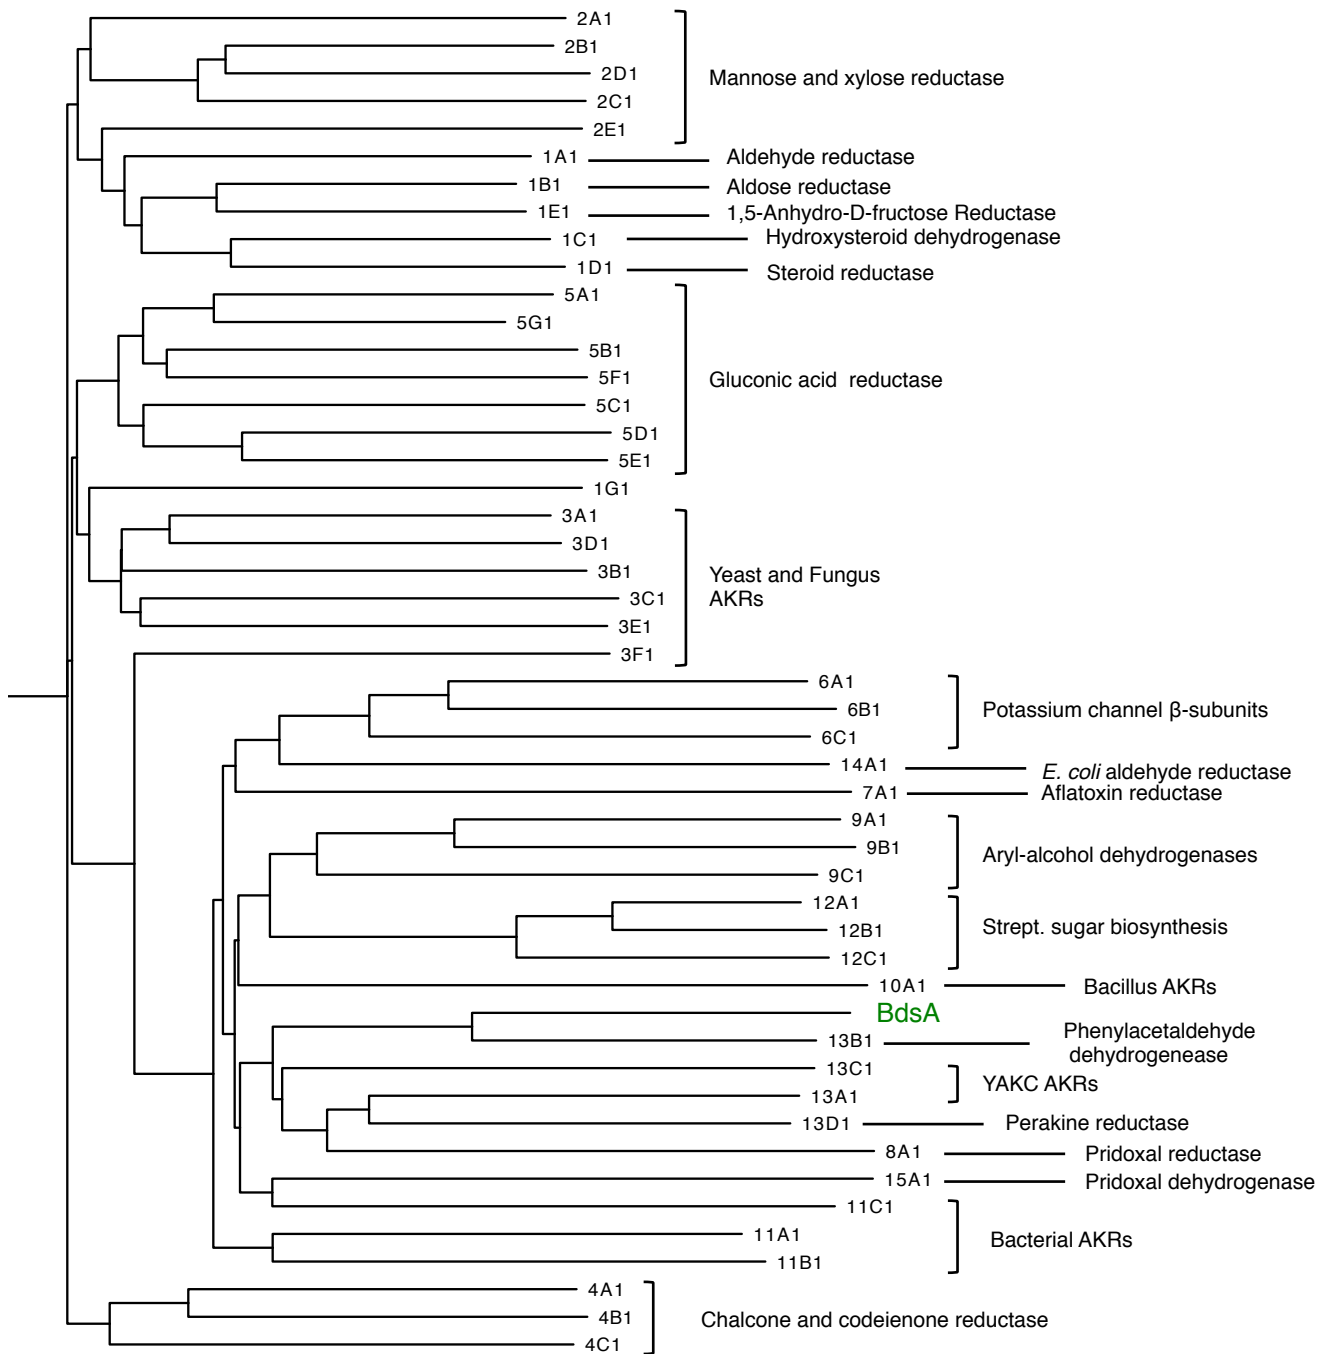

0.06

Figure S1

Asp62 Tyr67

Lys92

His142

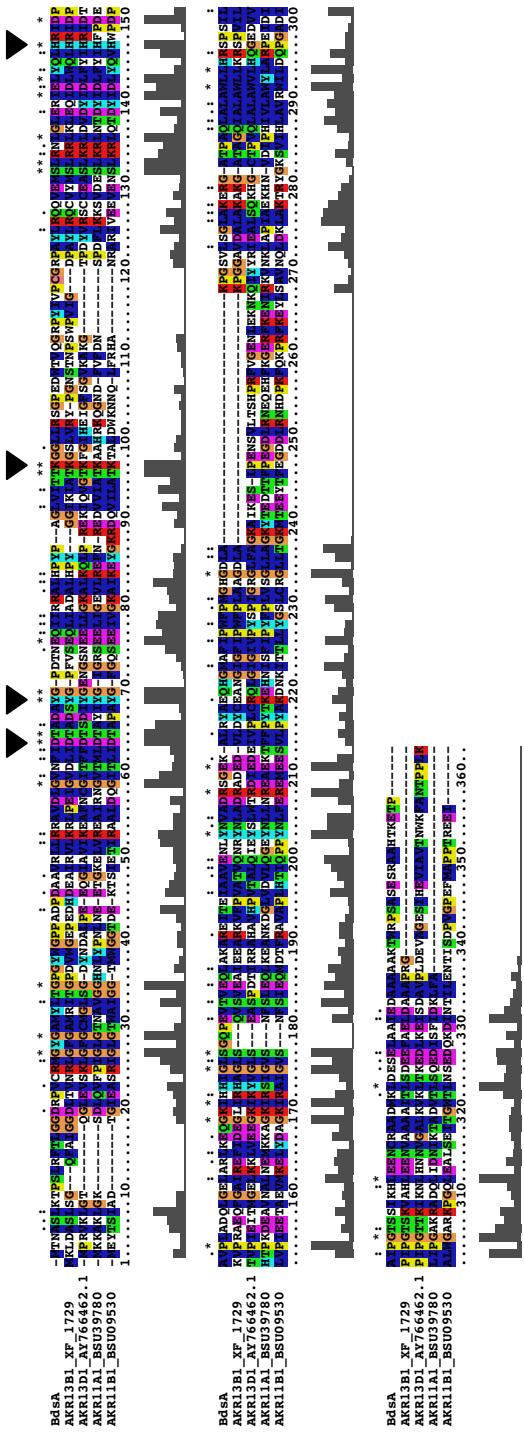

Figure S2

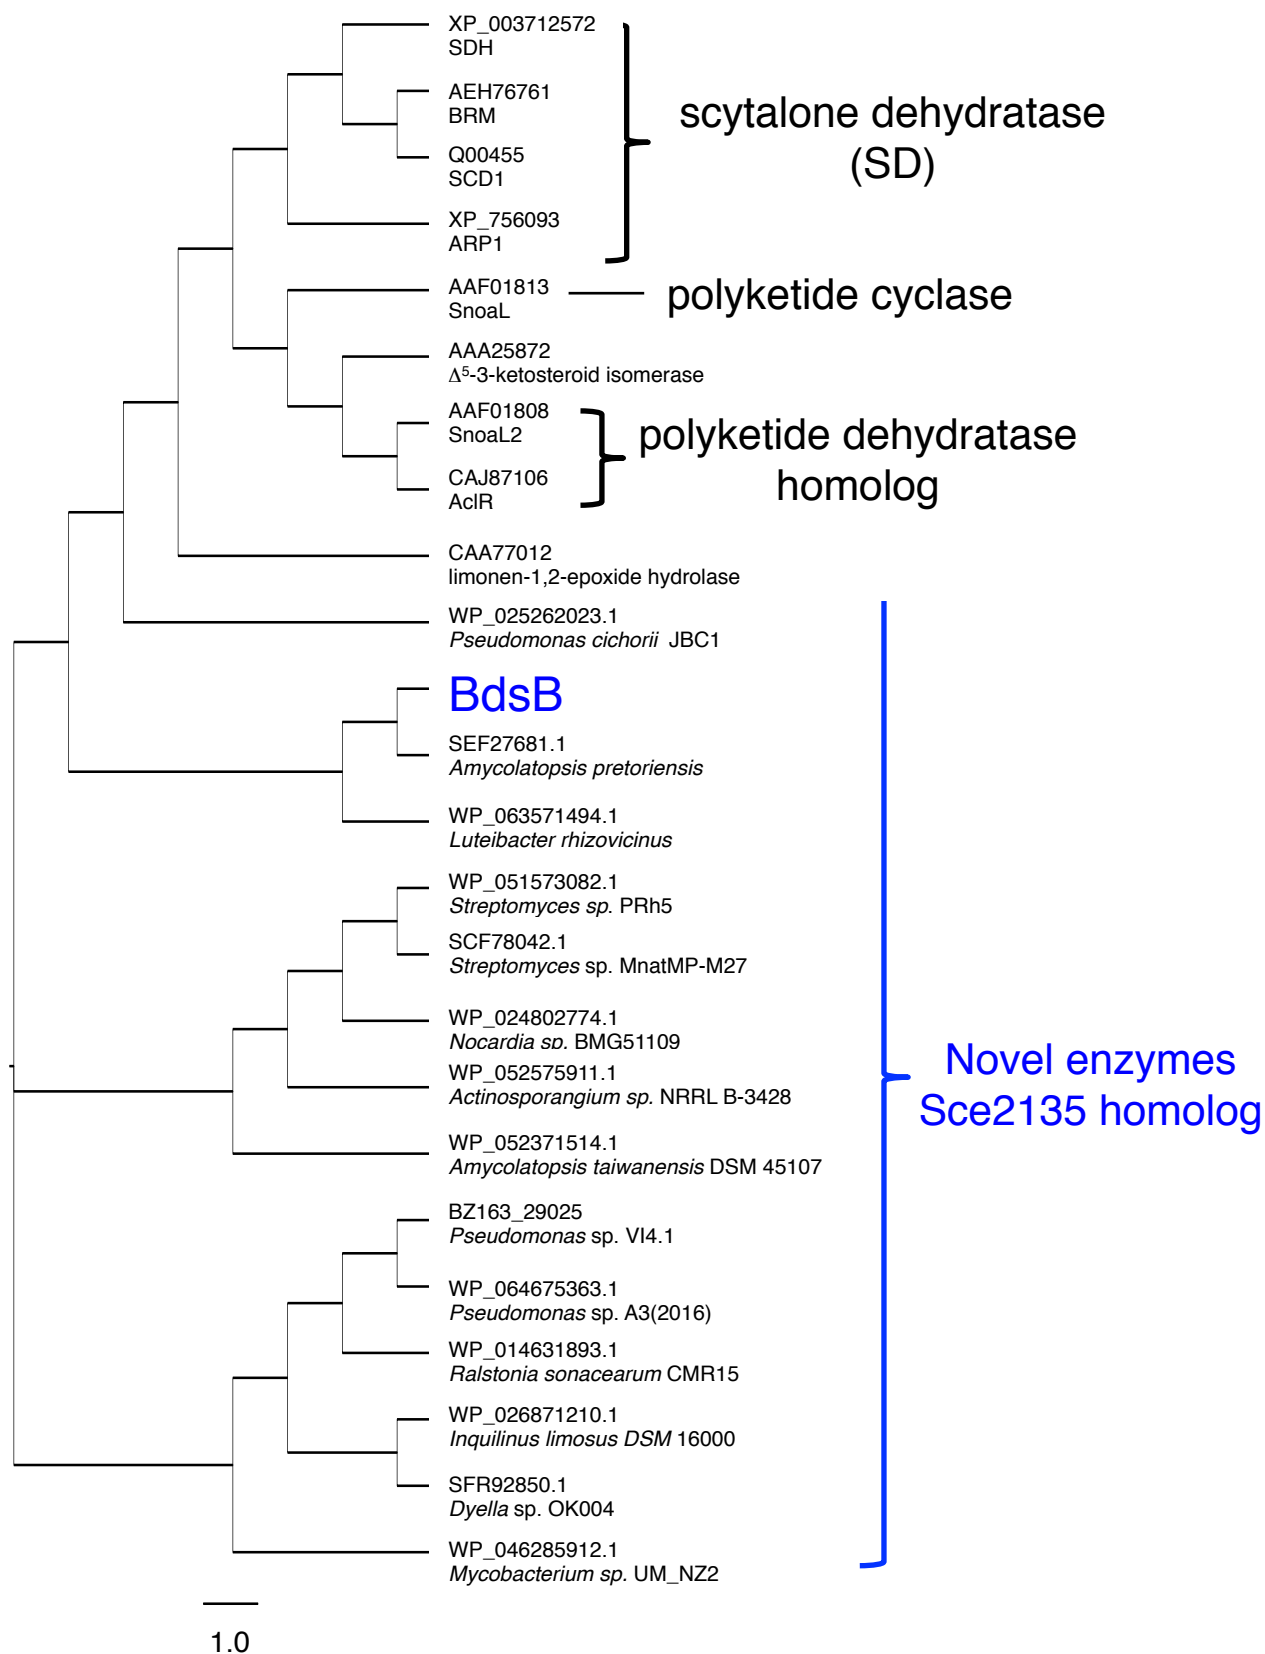

Figure S3



Val14 Ala32 Phe106 Gly109

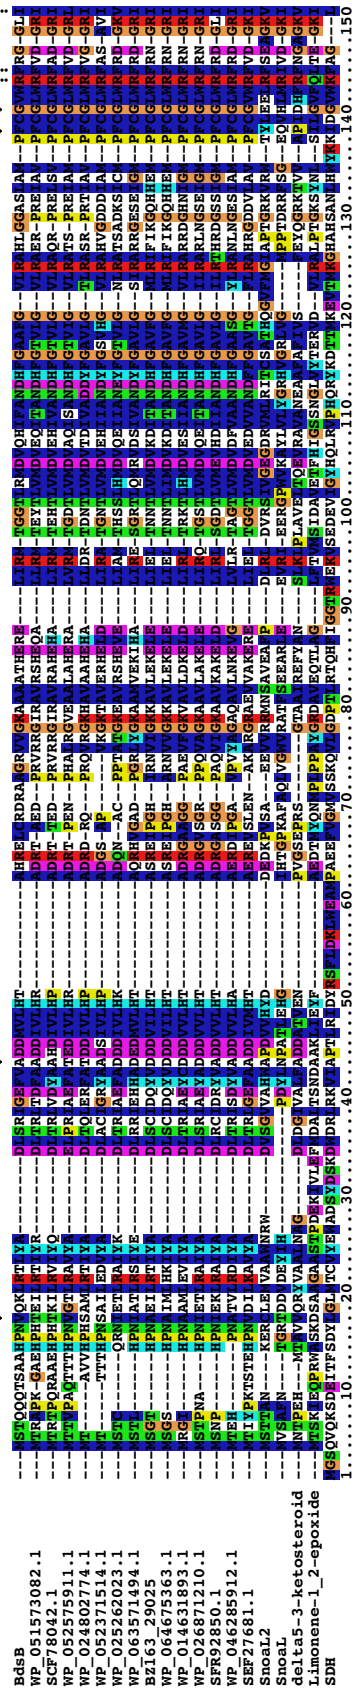

His121 Glu123

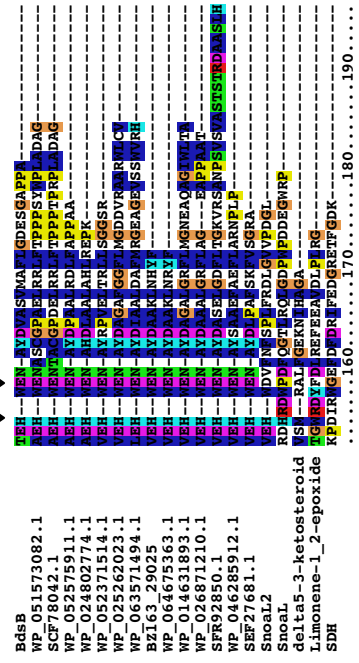

Figure S4

<sup>1</sup>H NMR spectrum of scytalone (**3**)

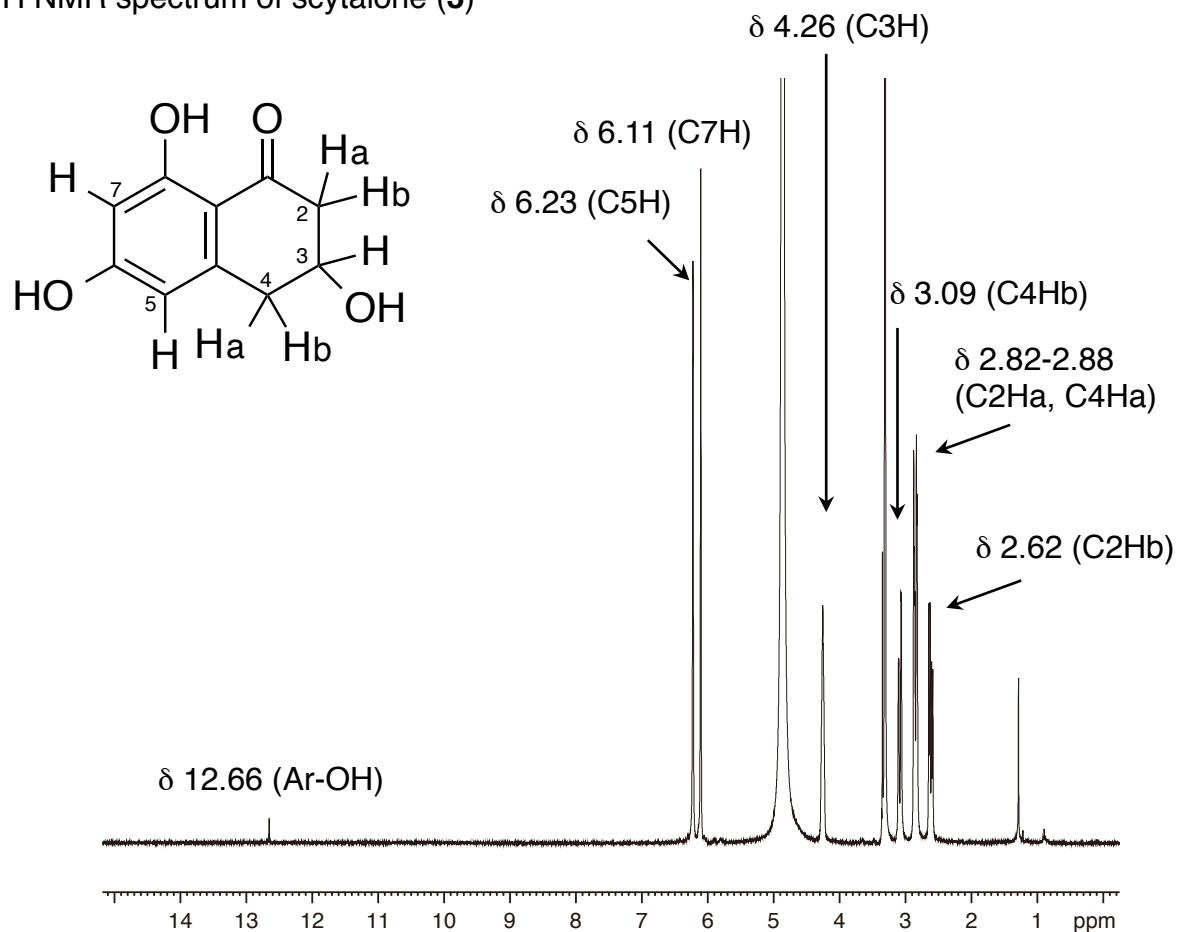

<sup>13</sup>C NMR spectrum of scytalone (**3**)

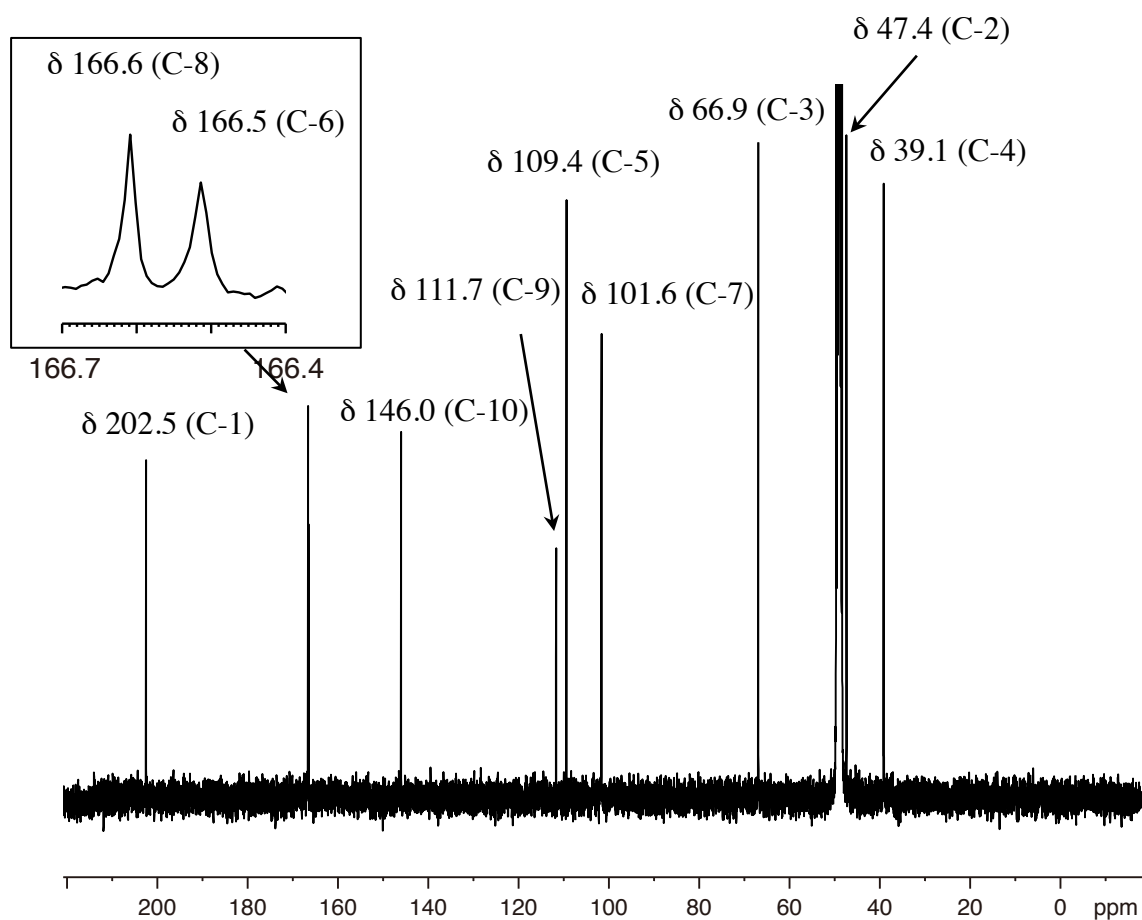

Figure S5

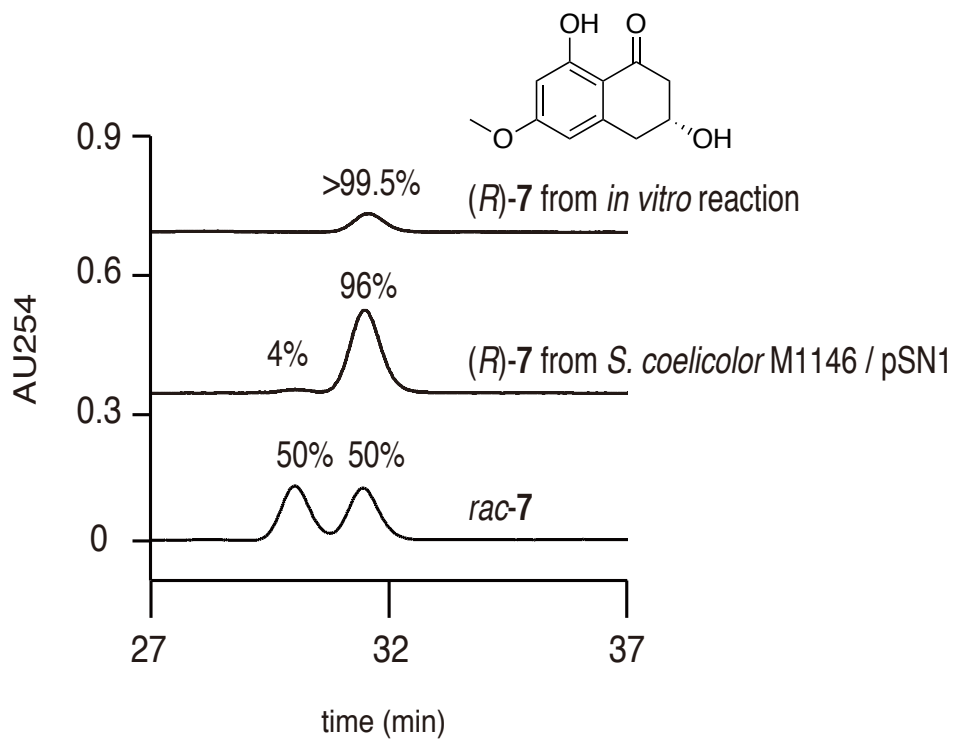

Figure S6

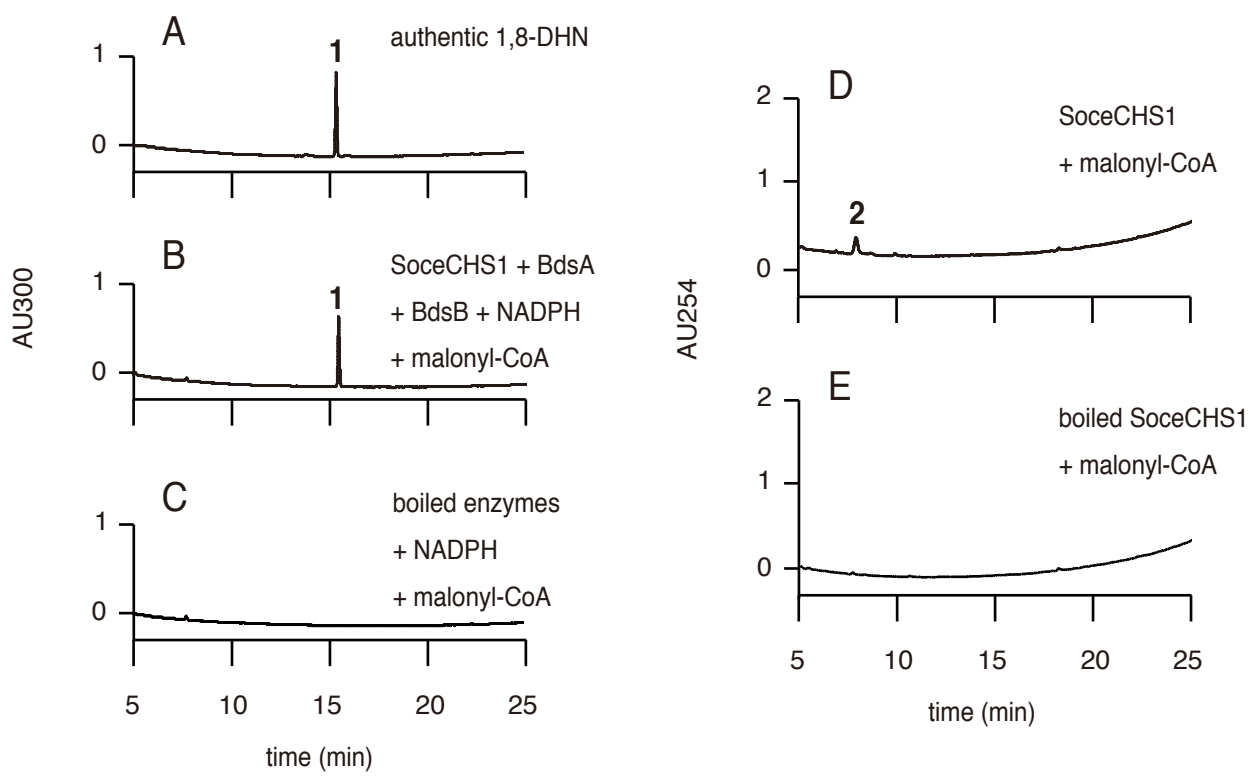

Figure S7

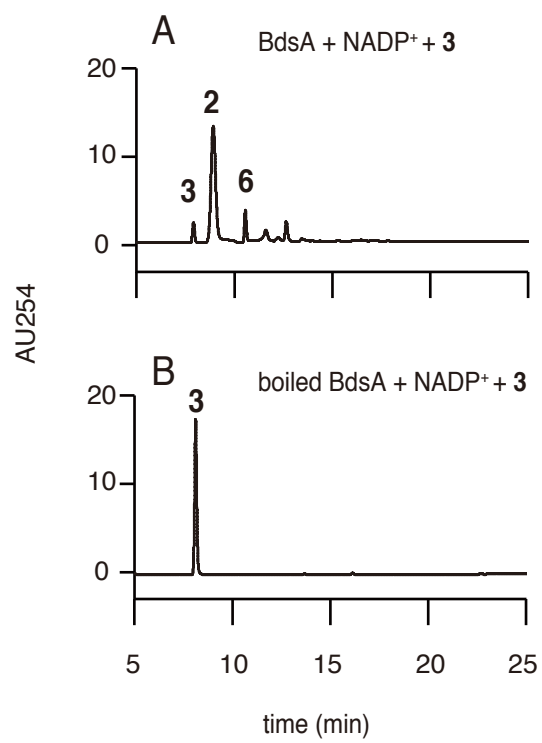

Figure S8

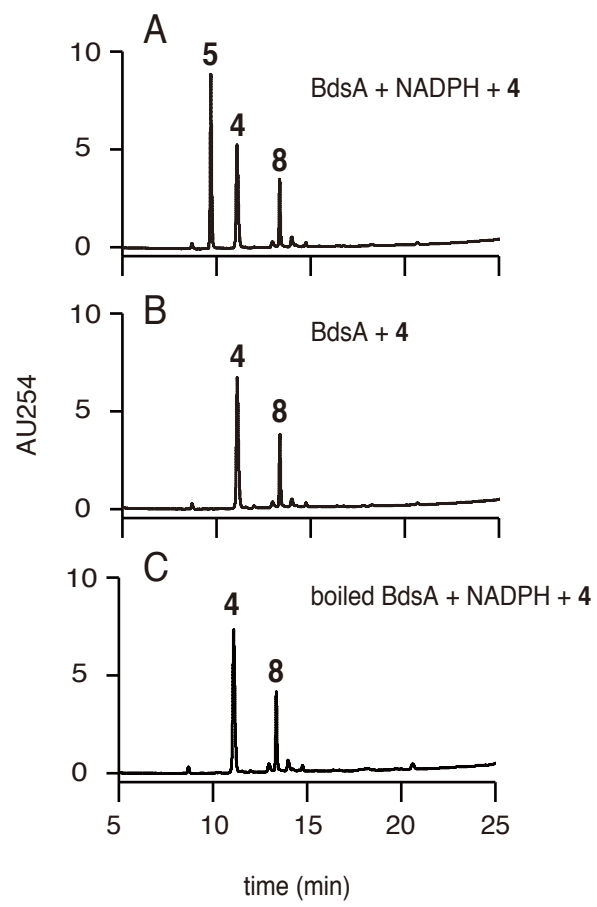

Figure S9

$^1\text{H}$  NMR spectrum of vermelone (**5**)

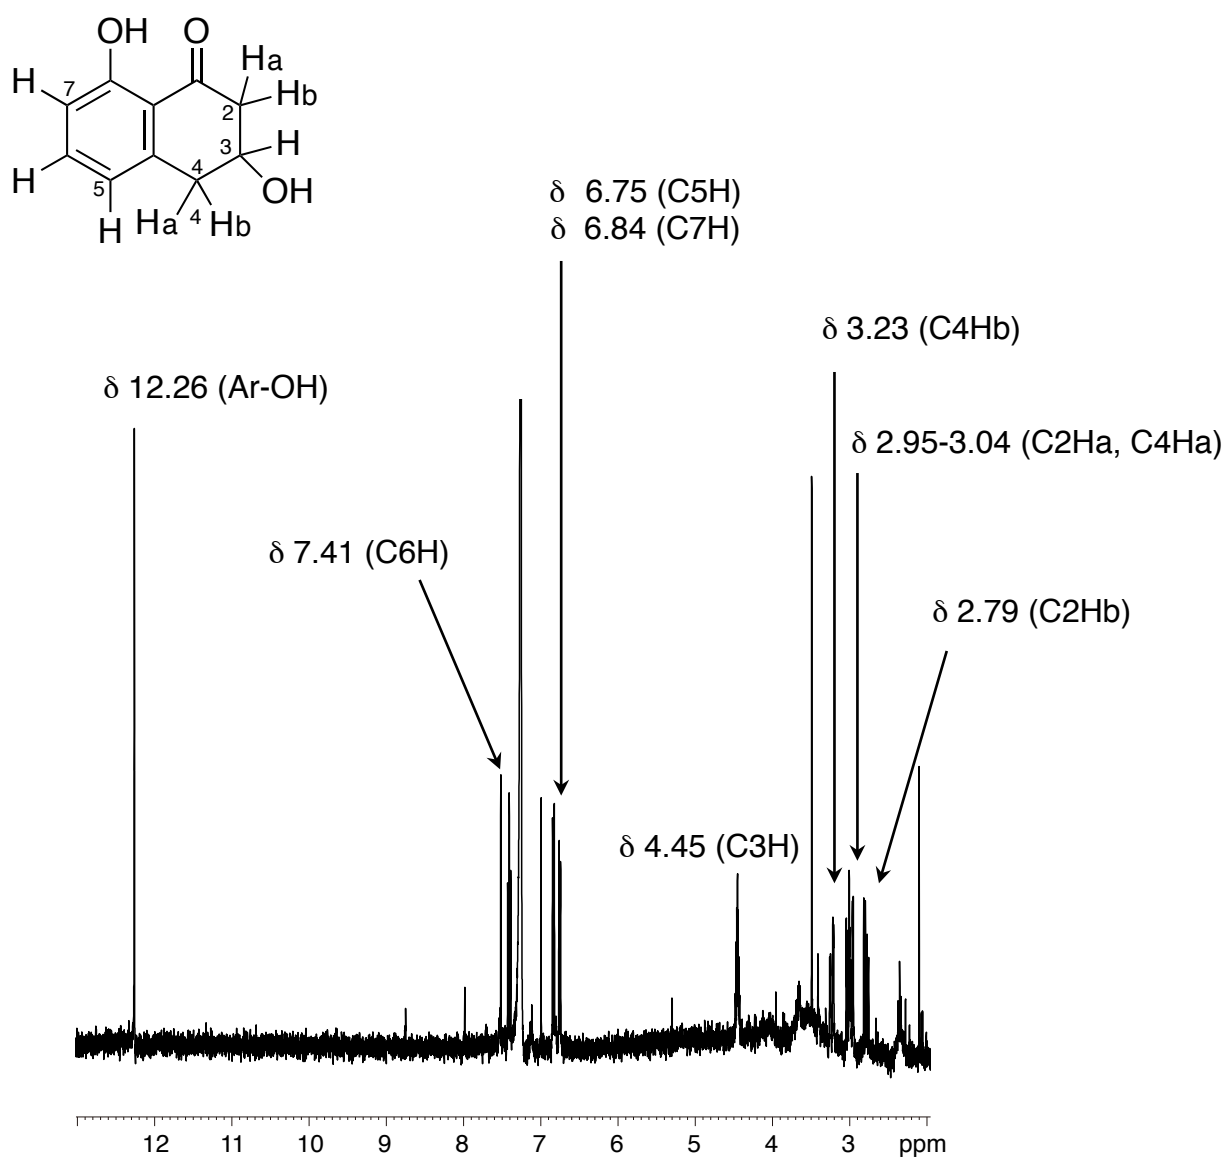

Figure S10

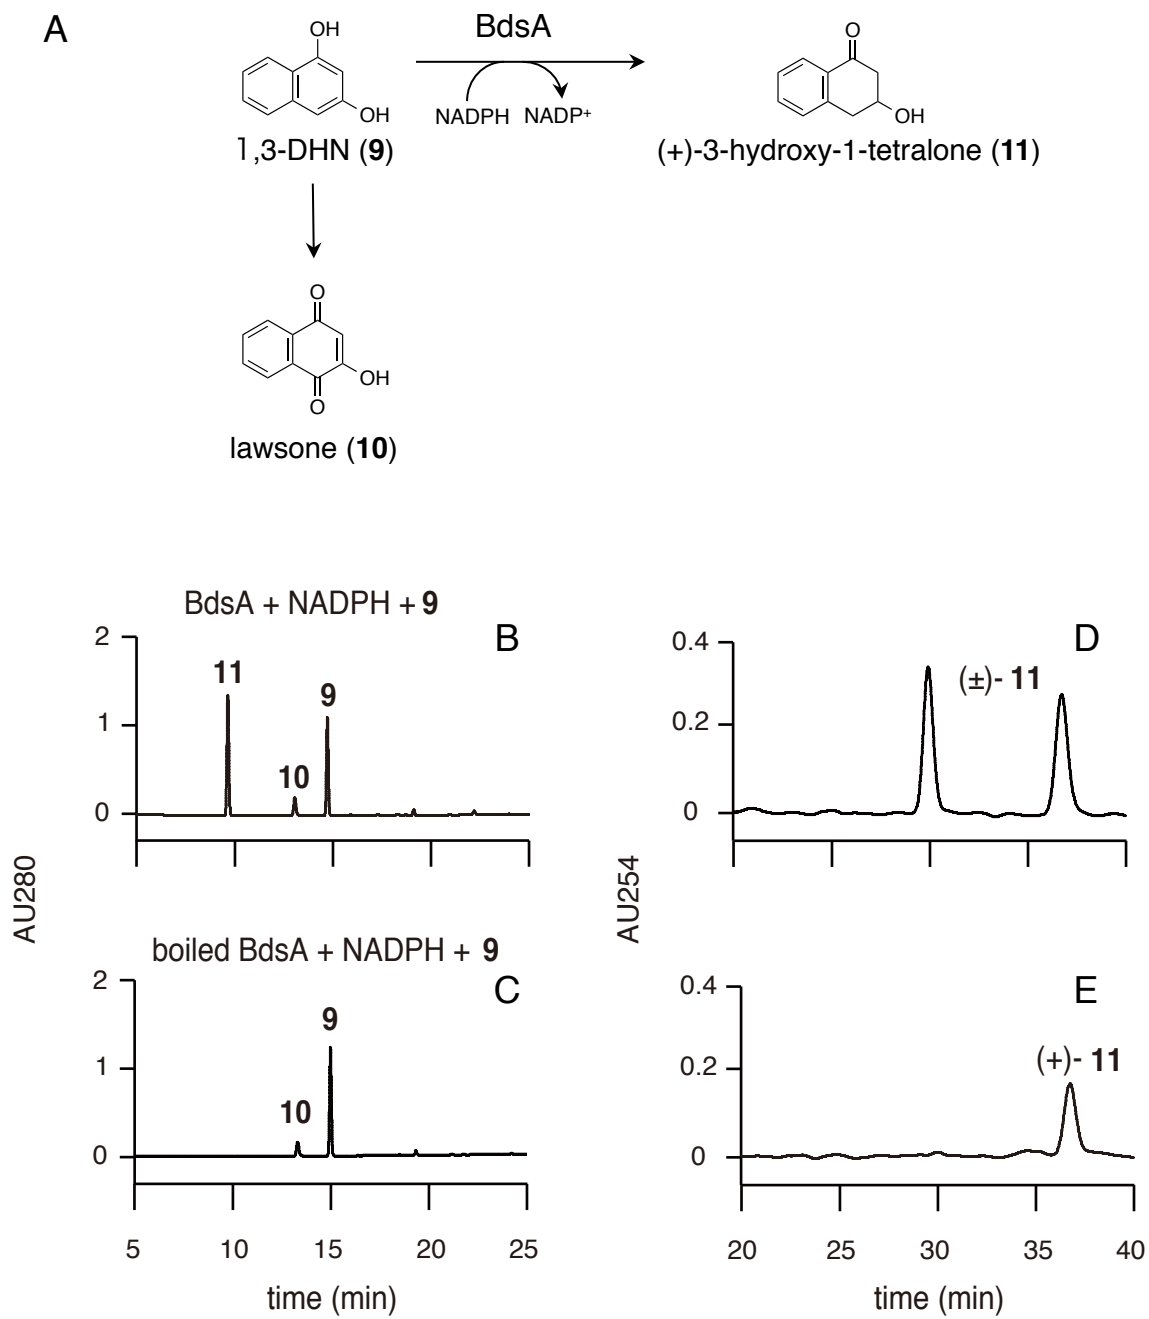

Figure S11



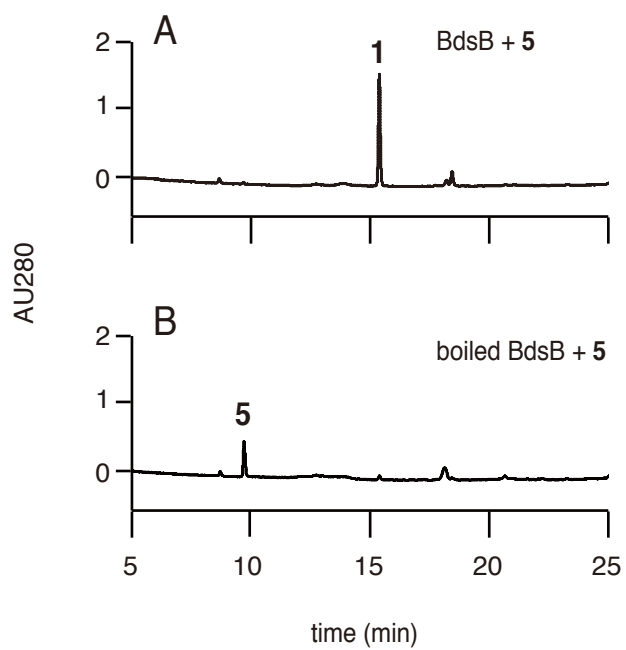

Figure S12

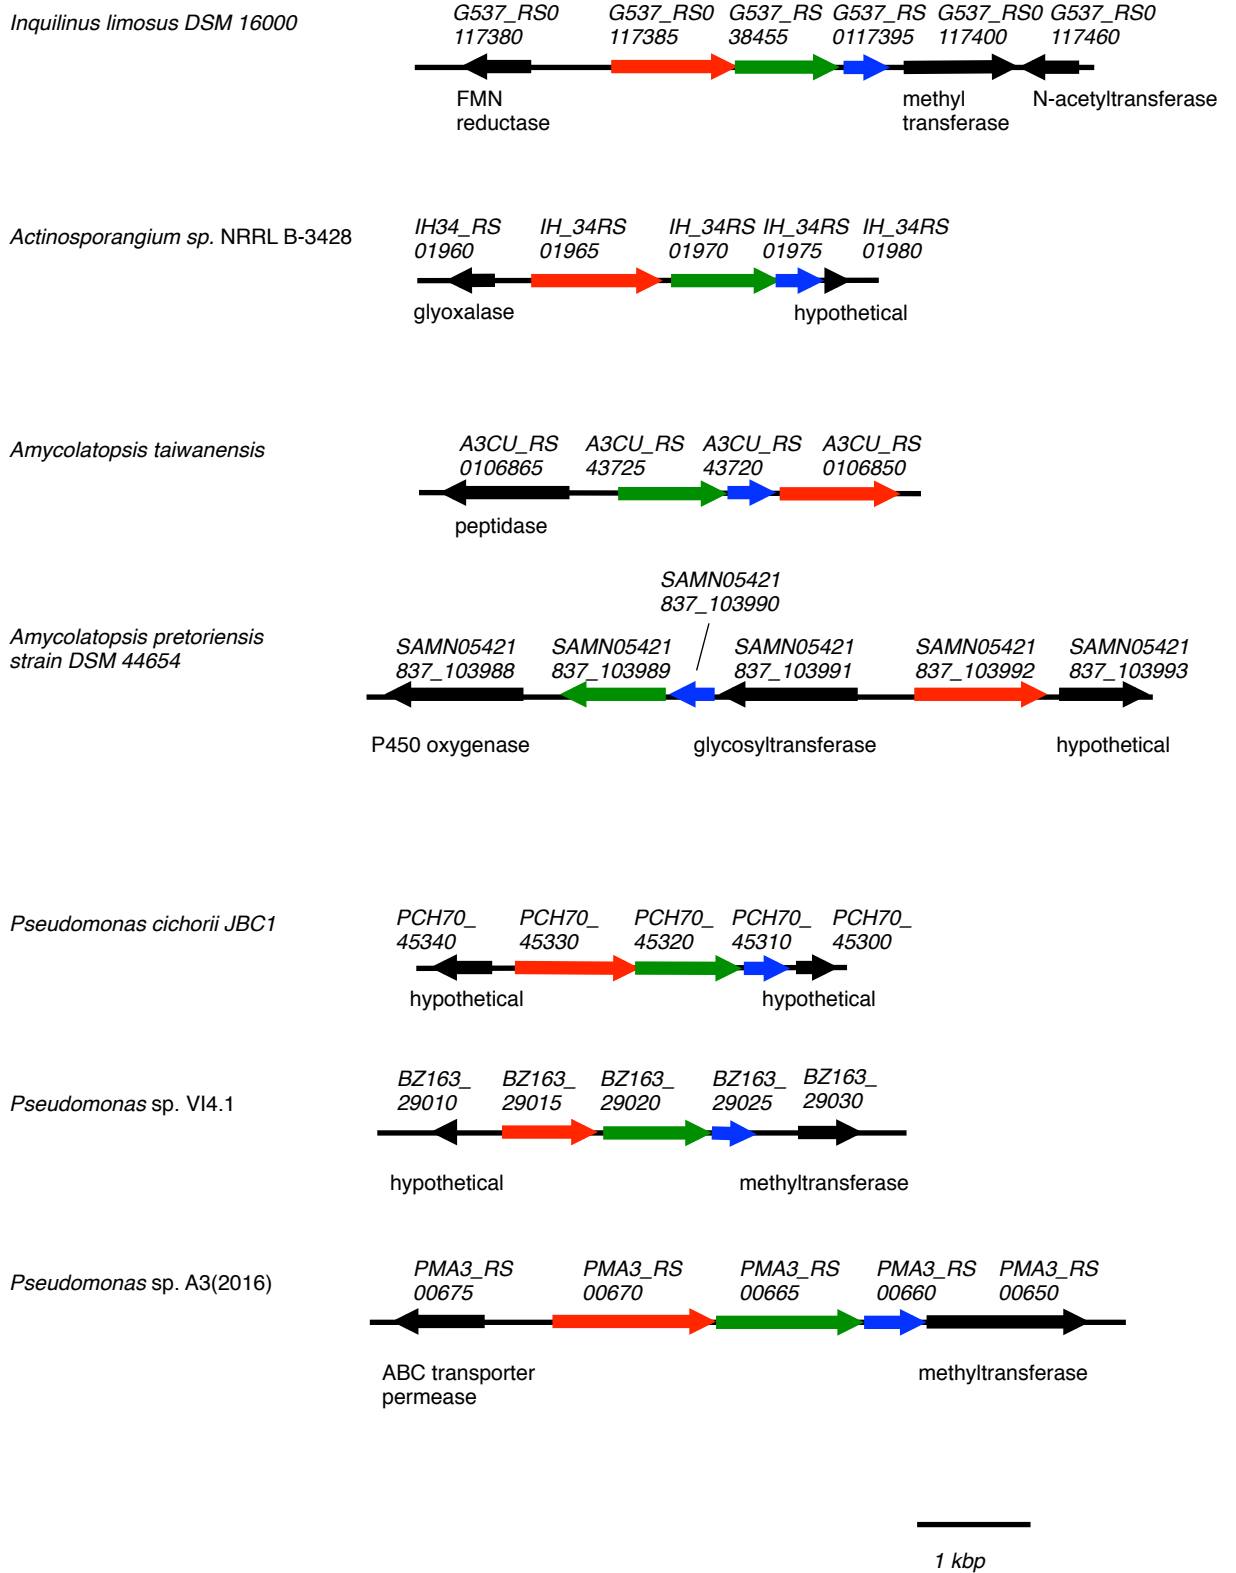

Figure S13

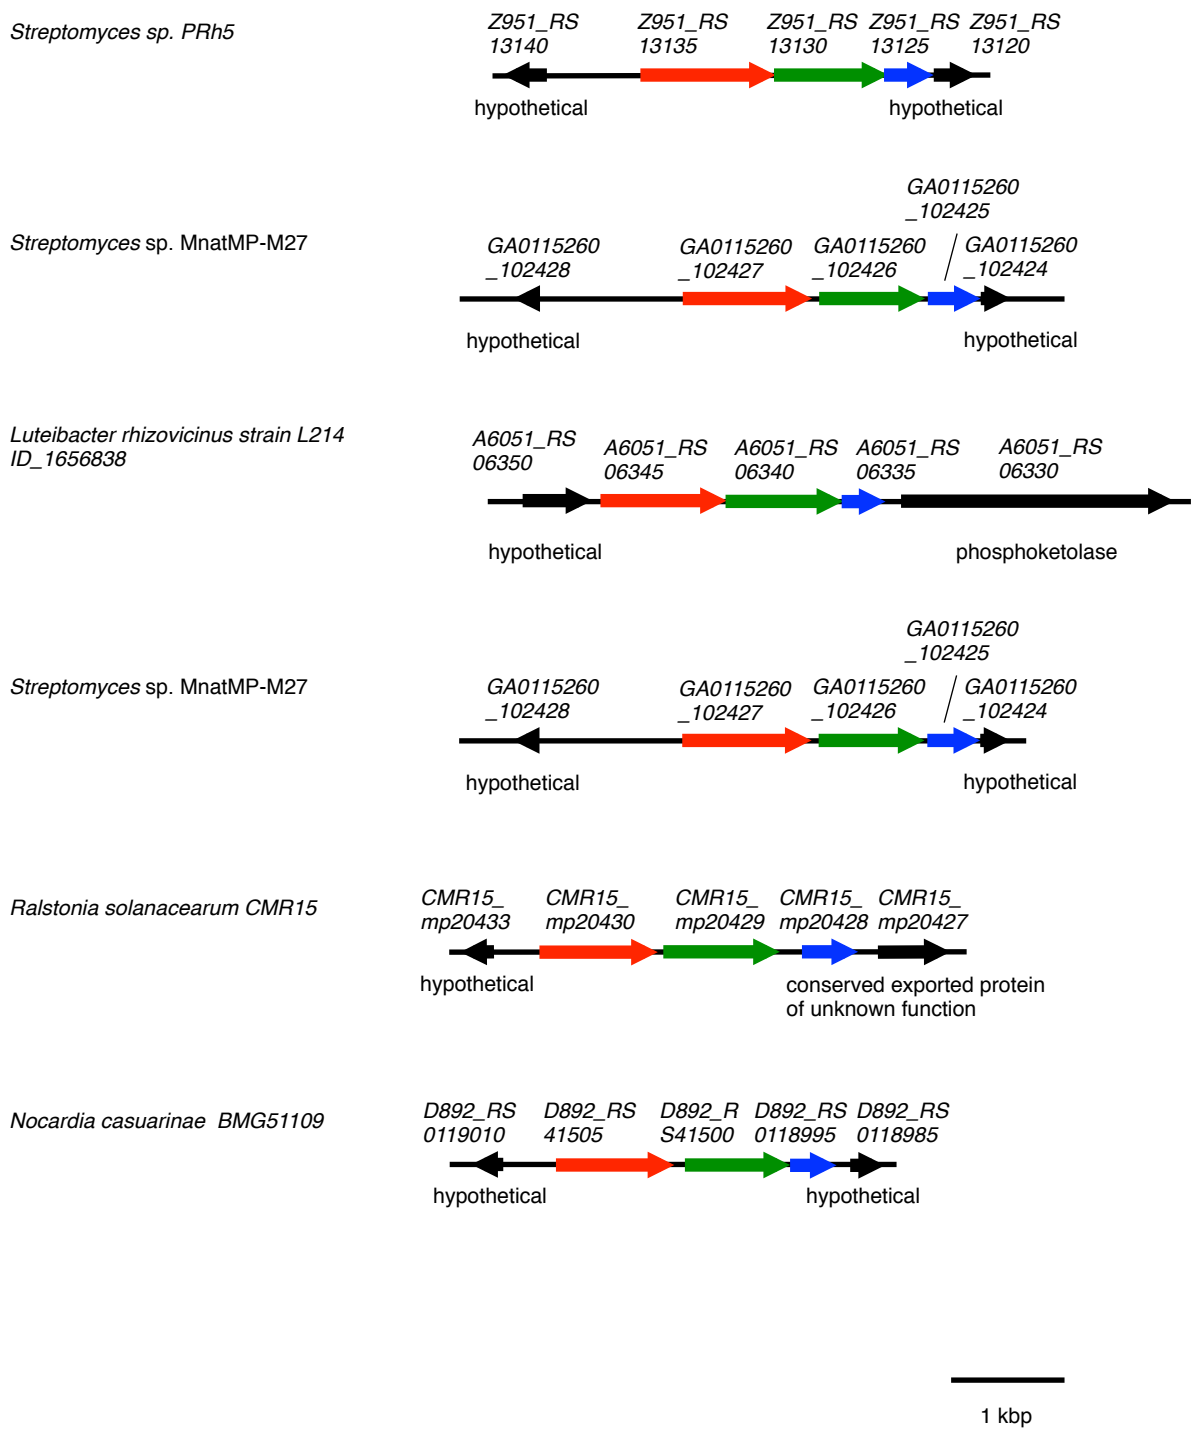

Figure S13 continued

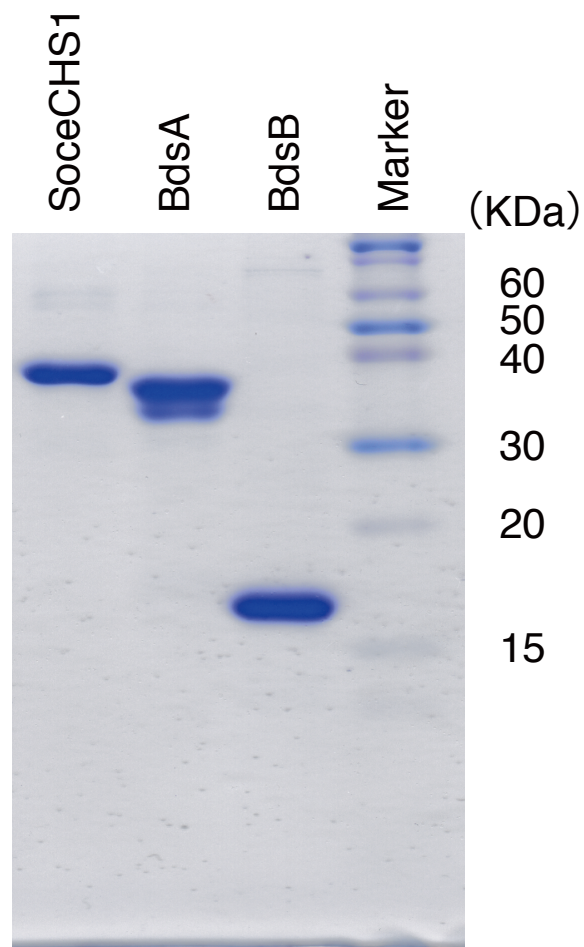

Figure S14

$^1\text{H}$  NMR spectrum of 1, 3, 8-trihydroxynaphthalene (**4**)

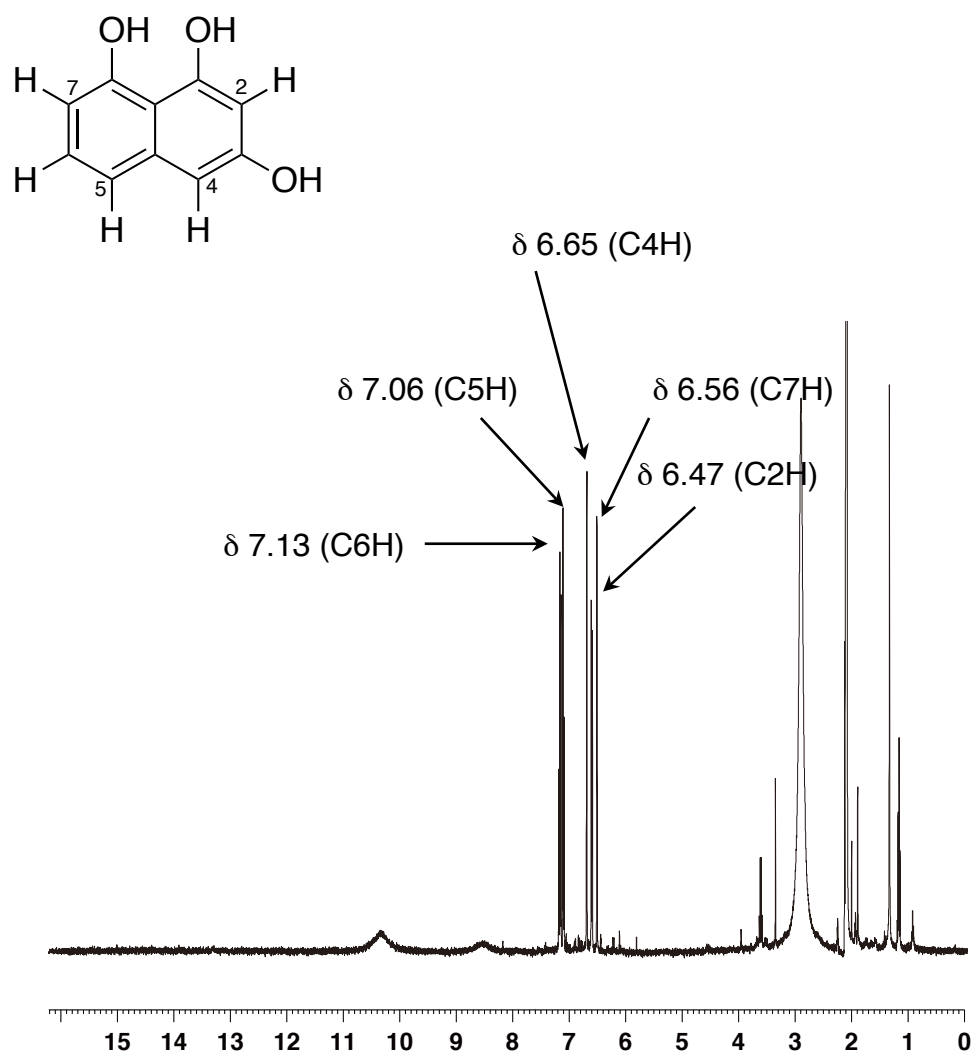

Figure S15
